# Supplementary material
Source: MDPI journal article supplement (https://www.mdpi.com/1996-1073/17/9/2046)
Supplement: s1 [file s1]

## Supplementary Materials

**Table S1.** Trend line equations and coefficient of determination  $R^2$  for the characteristics shown in Fig.4 Fig.5, Fig.6 and Fig.7.

| Figure  | Function                                | Type of trend line | Equation                                                                         | $R^2$  |
|---------|-----------------------------------------|--------------------|----------------------------------------------------------------------------------|--------|
| Fig. 4  | $E_{sep} = f(A)$                        | Polynomial 6 order | $y = 2E-09x^6 - 9E-07x^5 + 0.0001x^4 - 0.0085x^3 + 0.3238x^2 - 6.1625x + 67.924$ | 0.9927 |
|         | $R = f(A)$                              | Logarithmic        | $y = 0.2969\ln(x) - 0.4696$                                                      | 0.9814 |
|         | $Y_{CO_2} = f(A)$                       | Exponential        | $y = 0.0118e^{-0.009x}$                                                          | 0.9973 |
|         | $X_{CO_2} = f(A)$                       |                    | $y = 0.0004e^{-0.023x}$                                                          | 0.9998 |
| Fig. 5  | $E_{sep} = f(P_{CO_2})$                 | Polynomial 6 order | $y = -3E-09x^5 + 1E-06x^4 - 0.0003x^3 + 0.0267x^2 - 1.2991x + 46.994$            | 0.9999 |
|         | $R = f(P_{CO_2})$                       | Logarithmic        | $y = 0.3316\ln(x) - 0.862$                                                       | 0.9943 |
|         | $Y_{CO_2} = f(P_{CO_2})$                | Exponential        | $y = 0.0121e^{-0.004x}$                                                          | 0.9996 |
|         | $X_{CO_2} = f(P_{CO_2})$                |                    | $y = 0.0004e^{-0.01x}$                                                           | 1.0000 |
| Fig. 6a | $E_{sep} = f(P_{CO_2})$                 | Polynomial 6 order | $y = 3E-11x^6 - 2E-08x^5 + 4E-06x^4 - 0.0005x^3 + 0.0387x^2 - 1.4776x + 47.518$  | 1.0000 |
|         | $R = f(P_{CO_2})$                       | Logarithmic        | $y = 0.3443\ln(x) - 0.857$                                                       | 0.9977 |
|         | $Y_{CO_2} = f(P_{CO_2})$                | Exponential        | $y = 0.0102e^{-0.005x}$                                                          | 0.9988 |
|         | $X_{CO_2} = f(P_{CO_2})$                |                    | $y = 0.0004e^{-0.012x}$                                                          | 1.0000 |
| Fig. 6b | $E_{sep} = f(P_{CO_2})$                 | Polynomial 5 order | $y = -2E-09x^5 + 1E-06x^4 - 0.0002x^3 + 0.0186x^2 - 0.7951x + 42.202$            | 1.0000 |
|         | $R = f(P_{CO_2})$                       | Logarithmic        | $y = 0.3494\ln(x) - 0.8055$                                                      | 0.9989 |
|         | $Y_{CO_2} = f(P_{CO_2})$                | Exponential        | $y = 0.0075e^{-0.006x}$                                                          | 0.9982 |
|         | $X_{CO_2} = f(P_{CO_2})$                |                    | $y = 0.0004e^{-0.015x}$                                                          | 1.0000 |
| Fig. 7a | $N_{el} = f(P_{CO_2})$<br>for 0.02 bar  | Linear             | $y = 202.23x + 6478.5$                                                           | 1.0000 |
|         | $N_{el} = f(P_{CO_2})$<br>for 0.04 bar  | Linear             | $y = 147.17x + 6458.7$                                                           | 1.0000 |
|         | $N_{el} = f(P_{CO_2})$<br>for 0.05 bar  | Linear             | $y = 131.27x + 6458.7$                                                           | 1.0000 |
| Fig. 7b | $E_{sep} = f(P_{CO_2})$<br>for 0.04 bar | Polynomial 6 order | $y = 5E-11x^6 - 3E-08x^5 + 7E-06x^4 - 0.0009x^3 + 0.0664x^2 - 2.7222x + 74.768$  | 1.0000 |
| Fig. 7b | $E_{sep} = f(P_{CO_2})$<br>for 0.05 bar | Polynomial 6 order | $y = 7E-11x^6 - 4E-08x^5 + 9E-06x^4 - 0.0012x^3 + 0.0828x^2 - 3.3451x + 87.913$  | 1.0000 |
